# Supplementary material for: Modular Activation of Nuclear Factor-κB Transcriptional Programs in Human Diabetic Nephropathy
Source: Oxford University Press journal article supplement (doi:10.2337/db06-0477), 2006-10-25
Supplement: pg2993onlineappendix.doc [file pg2993onlineappendix.doc]

**Supplementary data:**

**Methods:**

**Microdissection and RNA isolation**

Cortical tissue segments were manually microdissected under a stereomicroscope with two sterile needle holders. From the microdissected tubulointerstitial compartments total RNA was isolated using a commercially available silica-gel based isolation protocol (RNeasy-Mini, Qiagen, Germany) and was diluted in 30 L RNase-free water. RNA quality and quantity was controlled by microfluid electrophoresis using the RNA 6000 Lab Chip on a 2100 Bioanalyzer (Agilent Technologies, Waldbronn, Germany).

**Preparation for Microarray analysis**

300-800 ng of total RNA from living donor (n=3), cadaveric donor (n=4), DN (n=13), and MCD (n=4) was reverse-transcribed in a 20 µl reaction with 2µl SuperScript II (Invitrogen GmbH, Karlsruhe, Germany, 200 U) and 1µl 33 pmol of T7-(dT)24 primer (5'-GGCCAGTGAATTGTAATACGACTCACTATAGGGAGA-(dT)24-3') in 5X first-strand buffer (Invitrogen GmbH, Karlsruhe, Germany), 2µl 100mM DTT (Invitrogen Corporation, Carlsbad, CA), 1µl 10mM dNTP (Amersham Pharmacia, Freiburg, Germany), 1µl T4gp32 (Amersham Pharmacia, Freiburg, Germany, 8mg/ml) and 0.5µl RNase inhibitor (RNasin, Promega, Mannheim, Germany, 40U/µl) at 42°C for 1 h. The second-strand synthesis was performed at 16°C for 2 h, in the presence of *E. coli* enzymes, DNA Polymerase I (Invitrogen GmbH, Karlsruhe, Germany, 40 U), DNA ligase (Invitrogen GmbH, Karlsruhe, Germany, 10U), RNase H (Roche, Basel, Switzerland, 1U/µl) and 1X second-strand buffer (Invitrogen GmbH, Karlsruhe, Germany). The double-stranded cDNA was blunt-ended using 10 U of T4 DNA polymerase (Invitrogen GmbH, Karlsruhe, Germany), purified by phenol/chloroform extraction and transcribed 16h at 37°C in the presence of biotin labeled-ribonucleotides, using the BioArray HighYield RNA transcript labeling kit (Enzo Laboratories, Farmingdale, NY) as described by the manufacturer. The biotin-labeled cRNA was purified using RNeasy mini-column (RNeasy kit; Qiagen GmbH, Hilden, Germany) followed by a quality check using the Bioanalyzer. The fragmentation, hybridization, staining and imaging was performed according the Affymetrix Expression Analysis Technical Manual.

**Reverse Transcription and quantitative RT-PCR (qRT-PCR)**

For qRT-PCR experiments reverse transcription of RNA was performed as previously described (8). Real-time RT-PCR was performed on a TaqMan ABI 7700 Sequence Detection System (Applied Biosystems, Darmstadt, Germany) using heat activated TaqDNA polymerase (Amplitaq Gold, Applied Biosystems, Darmstadt, Germany). After an initial hold of 2 min at 50°C and 10 min at 95°C the samples were cycled 40 times at 95°C for 15 sec and 60°C for 60 sec. Commercially available pre-developed TaqMan reagents (Applied Biosystems, Darmstadt, Germany) were used for CCL5/RANTES, endothelin-1 (EDN1), interferon beta-1 (IFNB1), interferon-inducible protein 10 (IP-10/CXCL10), and inducible nitric oxide synthase (NOS2A). As reference genes served 18 S ribosomal RNA (18 S rRNA), glyceraldehyde-3-phosphate-dehydrogenase (GAPDH), and Cyclophilin A, yielding comparable results. The data presented are normalized to Cyclophillin A.

Quantification of the given templates was performed according to the standard curve method. Serial dilutions of kidney cDNA were included in all PCR runs and served as standard curve. All measurements were performed in duplicate. Controls consisting of bidistilled H20 were negative in all runs.
